# Supplementary material for: Glycogene Expression Profile of Human Limbal Epithelial Cells with Distinct Clonogenic Potential
Source: MDPI journal article supplement (doi:10.3390/cells11091575), 2022-05-07
Supplement: s1 [file s1]

**Supplemental Table S1.** Relative expression ( $\Delta C_T$ ) of genes encoding glycosylation enzymes in clonogenic human limbal epithelial cells. High positive  $\Delta C_T$  values reflect low amplification efficiency. Values in bold indicate that gene expression was significantly higher in abortive colonies compared to clonogenic ( $2^{-\Delta C_T}$ ).

| Gene Symbol                               | RefSeq*          | Magnitude of Expression ( $\Delta C_T$ ) | Abortive Fold Change ( $2^{-\Delta C_T}$ ) |
|-------------------------------------------|------------------|------------------------------------------|--------------------------------------------|
| <i>N-Acetylgalactosaminyltransferases</i> |                  |                                          |                                            |
| <i>GALNT1</i>                             | NM_020474        | 0.63                                     | 1.32                                       |
| <i>GALNT2</i>                             | NM_004481        | 1.63                                     | 1.16                                       |
| <i>GALNT3</i>                             | NM_004482        | 0.98                                     | 0.56                                       |
| <i>GALNT4</i>                             | NM_003774        | 3.72                                     | 1.06                                       |
| <i>GALNT6</i>                             | NM_007210        | 4.20                                     | 0.40                                       |
| <i>GALNT7</i>                             | NM_017423        | 0.16                                     | 1.35                                       |
| <i>GALNT9</i>                             | NM_021808        | 12.72                                    | 1.05                                       |
| <i>GALNT10</i>                            | NM_198321        | 11.16                                    | 5.15                                       |
| <i>GALNT11</i>                            | NM_022087        | 5.45                                     | 0.87                                       |
| <i>GALNT12</i>                            | NM_024642        | 5.07                                     | 1.06                                       |
| <i>GALNT14</i>                            | NM_024572        | 2.03                                     | 0.59                                       |
| <i>GALNT16</i>                            | NM_020692        | 15.49                                    | 0.60                                       |
| <i>N-Acetylglucosaminyltransferases</i>   |                  |                                          |                                            |
| <i>B3GNT2</i>                             | NM_006577        | 5.87                                     | 2.79                                       |
| <i>B3GNT3</i>                             | NM_014256        | 7.72                                     | 1.10                                       |
| <i>B3GNT4</i>                             | NM_030765        | 12.19                                    | 0.41                                       |
| <i>B3GNT8</i>                             | NM_198540        | 10.16                                    | 0.83                                       |
| <i>GCNT1</i>                              | NM_001490        | 8.75                                     | 2.35                                       |
| <i>GCNT3</i>                              | NM_004751        | 7.82                                     | 2.04                                       |
| <b><i>GCNT4</i></b>                       | <b>NM_016591</b> | <b>10.68</b>                             | <b>11.26</b>                               |
| <i>MGAT1</i>                              | NM_002406        | 2.38                                     | 0.19                                       |
| <i>MGAT2</i>                              | NM_002408        | 7.99                                     | 1.29                                       |
| <i>MGAT4A</i>                             | NM_012214        | 5.54                                     | 0.08                                       |
| <i>MGAT4B</i>                             | NM_014275        | 3.80                                     | 1.48                                       |
| <i>MGAT5</i>                              | NM_002410        | 5.61                                     | 2.98                                       |
| <i>MGAT5B</i>                             | NM_144677        | 15.77                                    | 0.55                                       |
| <i>OGT</i>                                | NM_181673        | 2.02                                     | 0.28                                       |
| <i>POMGNT1</i>                            | NM_017739        | 4.61                                     | 1.18                                       |
| <i>Galactosyltransferases</i>             |                  |                                          |                                            |
| <i>B4GALT1</i>                            | NM_001497        | 2.53                                     | 1.52                                       |
| <i>B4GALT2</i>                            | NM_003780        | 0.11                                     | 0.92                                       |
| <i>B4GALT3</i>                            | NM_003779        | 1.85                                     | 1.57                                       |

|                                                         |                  |             |             |
|---------------------------------------------------------|------------------|-------------|-------------|
| <i>B4GALT5</i>                                          | NM_004776        | 0.04        | 0.87        |
| <i>C1GALT1</i>                                          | NM_020156        | 0.15        | 0.54        |
| <i>Glucosyltransferases</i>                             |                  |             |             |
| <i>UGGT1</i>                                            | NM_020120        | 2.29        | 2.48        |
| <i>UGGT2</i>                                            | NM_020121        | 4.34        | 0.90        |
| <i>Mannosidases</i>                                     |                  |             |             |
| <i>EDEM1</i>                                            | NM_014674        | 3.00        | 0.87        |
| <i>EDEM2</i>                                            | NM_018217        | 3.91        | 1.05        |
| <i>EDEM3</i>                                            | NM_025191        | 4.30        | 0.92        |
| <i>MAN1A1</i>                                           | NM_005907        | 6.89        | 1.18        |
| <i>MAN1A2</i>                                           | NM_006699        | 1.29        | 1.11        |
| <i>MAN1B1</i>                                           | NM_016219        | 4.07        | 1.44        |
| <i>MAN1C1</i>                                           | NM_020379        | 3.20        | 0.72        |
| <i>MAN2A1</i>                                           | NM_002372        | 9.07        | 3.43        |
| <i>MAN2B1</i>                                           | NM_000528        | 0.74        | 1.19        |
| <i>MANBA</i>                                            | NM_005908        | 5.69        | 8.79        |
| <i>Mannosyltransferases</i>                             |                  |             |             |
| <i>POMT1</i>                                            | NM_007171        | 7.76        | 0.34        |
| <i>POMT2</i>                                            | NM_013382        | 1.54        | 1.98        |
| <i>Galactosidases, glucosidases and hexosaminidases</i> |                  |             |             |
| <i>GANAB</i>                                            | NM_198334        | 2.31        | 1.04        |
| <i>GLB1</i>                                             | NM_000404        | 1.70        | 0.47        |
| <i>HEXA</i>                                             | NM_000520        | 1.42        | 0.71        |
| <i>HEXB</i>                                             | NM_000521        | -0.80       | 1.04        |
| <i>MOGS</i>                                             | NM_006302        | 7.77        | 1.07        |
| <i>PRKCSH</i>                                           | NM_002743        | 4.39        | 1.58        |
| <i>Fucosidases and fucosyltransferases</i>              |                  |             |             |
| <i>FUCA1</i>                                            | NM_000147        | 5.47        | 1.12        |
| <b><i>FUCA2</i></b>                                     | <b>NM_032020</b> | <b>4.44</b> | <b>2.11</b> |
| <i>FUT8</i>                                             | NM_178157        | 4.55        | 3.83        |
| <i>FUT11</i>                                            | NM_173540        | 3.40        | 0.70        |
| <i>POFUT1</i>                                           | NM_172236        | 8.73        | 1.68        |
| <i>POFUT2</i>                                           | NM_133635        | 6.42        | 0.06        |
| <i>Sialidases</i>                                       |                  |             |             |
| <i>NEU1</i>                                             | NM_000434        | 3.24        | 0.55        |
| <i>NEU2</i>                                             | NM_005383        | 12.90       | 1.35        |
| <i>NEU3</i>                                             | NM_006656        | 5.49        | 2.50        |

|                                                     |           |       |      |
|-----------------------------------------------------|-----------|-------|------|
| <i>NEU4</i>                                         | NM_080741 | 14.57 | 0.71 |
| <i>Sialyltransferases</i>                           |           |       |      |
| <i>ST3GAL1</i>                                      | NM_173344 | 5.44  | 0.93 |
| <i>ST3GAL2</i>                                      | NM_006927 | 7.83  | 0.25 |
| <i>ST6GAL1</i>                                      | NM_003032 | 4.38  | 0.09 |
| <i>ST6GALNAC1</i>                                   | NM_018414 | 5.95  | 2.43 |
| <i>ST8SIA4</i>                                      | NM_175052 | 5.70  | 0.27 |
| <i>Mannose-6-phosphate synthesis and catabolism</i> |           |       |      |
| <i>GNPTAB</i>                                       | NM_024312 | 2.39  | 0.77 |
| <i>GNPTG</i>                                        | NM_032520 | 3.43  | 1.83 |
| <i>NAGPA</i>                                        | NM_016256 | 7.36  | 1.12 |
| <i>Other glycosylation genes</i>                    |           |       |      |
| <i>AGA</i>                                          | NM_000027 | 3.92  | 0.30 |
| <i>C1GALT1C1</i>                                    | NM_152692 | 3.02  | 0.43 |

---

\*Reference sequence database at NCBI (<https://www.ncbi.nlm.nih.gov/refseq/>)
